# Supplementary material
Source: PubMed Central journal article supplement (PMC5386501)

**Supplementary Information File S1A.** Experimental details on the genetic analysis.

| <b>Primer and probe sequences</b>                                                                                                                                                                                                                                      | <b>Amplicon information</b>                                                                                                                    |
|------------------------------------------------------------------------------------------------------------------------------------------------------------------------------------------------------------------------------------------------------------------------|------------------------------------------------------------------------------------------------------------------------------------------------|
| 1F: 5'-CAAGTTTGGCTCCGGCGCTGC-3' (EX1)<br>1R: 5'-AGCGCTTGTCGGCGATGTGC-3' (EX2)                                                                                                                                                                                          | Transcript variant validation (cDNA)<br>X3 (canonical): 360 bp; X1: 535 bp                                                                     |
| 2F: 5'-TGAGCCGTTCTCCGTCACACGTC-3' (EX1a)<br>2R: 5'-GGCGGTCGCATCCGTTCTGC-3' (EX1b)                                                                                                                                                                                      | Transcript variant validation (cDNA)<br>X2: 140 bp (231 bp gDNA)                                                                               |
| 3F: 5'-GGTGGCTAGGAGTTGGCTGGA-3' (IN1)<br>3R: 5'-TCGCCCTCTTTGGTCTGGTG-3' (EX2)                                                                                                                                                                                          | Variant detection (gDNA): 742 bp                                                                                                               |
| 4F: 5'-GCCATCGTGCTTCTGATTGC-3' (EX2)<br>4R: 5'-GCAGGGGACACTGGAAGGAA-3' (3'-UTR)                                                                                                                                                                                        | Variant detection (gDNA): 900 bp                                                                                                               |
| 5F: 5'- TCTGGGGCTACGAGTTC-3' (EX2)<br>5R: 5'-ACGACTCCTCCA ACTTGA-3' (EX2)<br>5W: 5'-FAM-TGACTTCAGCCTTTTTGACCA-BHQ1-3'<br>5M: 5'-TR-ACTTCAGCCCTTTTTGACCAG-BHQ2 -3'                                                                                                      | Genotyping assay with dual labelled probes<br>165 bp (gDNA)<br>5W: Wt-probe<br>5M: Mt-probe                                                    |
| <b><u>PCR mix (1-4):</u></b><br>5,7 µl H <sub>2</sub> O<br>1,0 µl 10x Key buffer<br>1,0 µl Primers (5 µM each)<br>0,2 µl dNTPs (10 mM each)<br>0,1 µl Tempase HS DNA polymerase (5 U/µl)<br><u>2,0 µl Template</u><br>10,0 µl Total volume                             | <b><u>PCR program (1-4):</u></b><br>14'30" - 95°C<br>00'30" - 95°C ]<br>00'30" - 65°C ] 35x<br>01'00" - 72°C ]<br>04'00" - 72°C<br>Hold - 15°C |
| <b><u>qPCR mix (5):</u></b><br>4,7 µl H <sub>2</sub> O<br>1,0 µl 10x Key buffer<br>1,0 µl Primers (5 µM each)<br>1,0 µl Probes (5 µM each)<br>0,2 µl dNTPs (10 mM each)<br>0,1 µl Tempase HS DNA polymerase (5 U/µl)<br><u>2,0 µl Template</u><br>10,0 µl Total volume | <b><u>qPCR program (5):</u></b><br>14'30" - 95°C<br>00'20" - 95°C ]<br>00'40" - 60°C ] 40x<br>Plate read ]                                     |
| <b><u>Sequencing mix:</u></b><br>3,0 µl H <sub>2</sub> O<br>2,0 µl 5x SEQ-buffer<br>1,0 µl GC-rich<br>0,5 µl RR-mix<br>1,5 µl Sequencing primer (2 µM)<br><u>2,0 µl Template</u><br>10,0 µl Total volume                                                               | <b><u>Sequencing program:</u></b><br>2'00" - 95°C<br>0'20" - 95°C ]<br>0'10" - 60°C ] 30x<br>4'00" - 65°C ]<br>Hold - 15°C                     |

**Supplementary Information File S1B.** Coding and protein sequence of canine KCNJ10. The c.986T>C (p.(Leu329Pro)) variation is shown in red.

```
1 M T S V A K V Y Y S Q T T Q T E S R P L
1 atgacgtctgtcgcgaaggtgtactacagccagaccactcagacggagagccggcccctc
21 V G P G V R R R R V L T K D G R S N V R
61 gtgggcccaggggtccggcgccgggtcctgaccaaggacggccgcagcaacgtgagg
41 M E H I A D K R F L Y L K D L W T T F I
121 atggagcacatcgccgacaagcgcttcctctacctcaaggacctgtggaccaccttcac
61 D M Q W R Y K L L L F S A T F A G T W F
181 gacatgcagtgggcgctacaagctgctgctcttctcggcgacctttgcaggcacctgggtc
81 L F G V V W Y L V A V A H G D L L E L G
241 ctcttcggcgtggtgtggtatctggtggctgtggccccacggggacctgctggagctcggc
101 P P A N H T P C V V Q V H T L T G A F L
301 cccccggccaaccacacccccctgctggttacaggtgcacacgctcacgggggccttcctc
121 F S L E S Q T T I G Y G F R Y I S E E C
361 ttctccctcgaatcgcagaccaccatcggctacggcttccgctacatcagtgaggagtgc
141 P L A I V L L I A Q L V L T T I L E I F
421 ccgctggccatcgtgcttctgattgccagctggtgctcaccaccatcctggaaatcttc
161 I T G T F L A K I A R P K K R A E T I R
481 atcacggggaccttcctggcaaagatcgcccggcccaagaagcgggcgagaccatccgg
181 F S Q H A V V A A H N G K P C L M I R V
541 ttcagccagcacgcggtcgtcgcggccccacaacgggaagccctgcctcatgatccgagtc
201 A N M R K S L L I G C Q V T G K L L Q T
601 gccaacatgcggaagagcctcctcatcggctgccaggtgacgggcaagctgcttcagacc
221 H Q T K E G E N I R L N Q V N V T F Q V
661 caccagaccaaagagggcgagaacatccggctcaaccaggtcaacgtgactttccaggtc
241 D T A S D S P F L I L P L T F Y H V V D
721 gacacggcctcggacagcccccttcctcattctgcccctgaccttctaccacgtggtagat
261 E T S P L K D L P L R S G E G D F E L V
781 gagaccagtccttgaaagacctccccctgcgccagtgggcgaggggtgacttcgagctggtg
281 L I L S G T V E S T S A T C Q V R T S Y
841 ctgatacctcagtgggacgggtggagtccaccagtgccacctgccaggtgcgccagctcctac
301 L P E E I L W G Y E F T P A I S L S A S
901 ctgccggaggagatcctctggggctacgagttcaccgccatctcgtgtccgccagc
321 G K Y I A D F S L F D Q V V K V A S P G
961 ggcaaatacatcgctgacttcagcctttttgaccaggtggtgaaagtggcctcccctggc
341 G L R D S A V R Y G D P E K L K L E E S
1021 ggctccgcgacagcgtgtccgctacggagaccctgagaagctcaagttggaggagtgc
361 L R E Q A E K E G S A L S V R I S N V *
1081 ttaagggaaacaagcgggagaaggaggggcagcgcctgagcgtgcgcatcagcaacgtctga
```

**Supplementary Information File S1C. KCNJ10 protein BLAST alignment between human (Acc. No. NP\_002232.2) and dog (Acc. No. XP\_545752.3).**

| Score           | Identities                                                                                     | Positives     | Gaps       |
|-----------------|------------------------------------------------------------------------------------------------|---------------|------------|
| 771 bits (1992) | 374/380 (98%)                                                                                  | 377/380 (99%) | 0/380 (0%) |
| Human 1         | MTSVAKVYYSQTTQTESRPLMGPGIRRRRVLT KDGRSNVRMEHIADKRFLYLKDLWTTFI                                  |               | 60         |
| Dog 1           | MTSVAKVYYSQTTQTESRPL+GPG+RRRRVLT KDGRSNVRMEHIADKRFLYLKDLWTTFI                                  |               | 60         |
| Human 61        | DMQWRYKLLLF SATFAGTWFLFGVWVYLVAVAHGD LLELDPPANHTPCVVQVHTLTGAFL                                 |               | 120        |
| Dog 61          | DMQWRYKLLLF SATFAGTWFLFGVWVYLVAVAHGD LLEL P PANHTPCVVQVHTLTGAFL                                |               | 120        |
| Human 121       | FSLESQTTIGYGFRYI SEECPLAIVLLIAQLVLT T T I L E I F I T G T F L A K I A R P K K R A E T I R      |               | 180        |
| Dog 121         | FSLESQTTIGYGFRYI SEECPLAIVLLIAQLVLT T T I L E I F I T G T F L A K I A R P K K R A E T I R      |               | 180        |
| Human 181       | FSQHAVVASHNGK PCLMIRVANMRKSL L I G C Q V T G K L L Q T H Q T K E G E N I R L N Q V N V T F Q V |               | 240        |
| Dog 181         | FSQHAVVA+HNGK PCLMIRVANMRKSL L I G C Q V T G K L L Q T H Q T K E G E N I R L N Q V N V T F Q V |               | 240        |
| Human 241       | DTASDSPFLILPLTFYHVVD ETSPLKDLPLRS GEGDFELVLILSGTVESTSATCQVRTSY                                 |               | 300        |
| Dog 241         | DTASDSPFLILPLTFYHVVD ETSPLKDLPLRS GEGDFELVLILSGTVESTSATCQVRTSY                                 |               | 300        |
| Human 301       | LPEEILWGYEFTPAISLSASGKYIADFS LFDQVVKV ASPGLRDSTVRYGDPEK LKLEES                                 |               | 360        |
| Dog 301         | LPEEILWGYEFTPAISLSASGKYIADFS LFDQVVKV ASP GLRDS VRYGDPEK LKLEES                                |               | 360        |
| Human 361       | LREQAEKEGSALSVRISNV*                                                                           | 380           |            |
| Dog 361         | LREQAEKEGSALSVRISNV*                                                                           | 380           |            |

**Supplementary Information File S1D.** Chromatogram of the region containing the c.986T>C (p. (Leu329Pro)) variation (in red) in a (1) homozygous wild type, (2) heterozygous and (3) homozygous mutant animal.

1

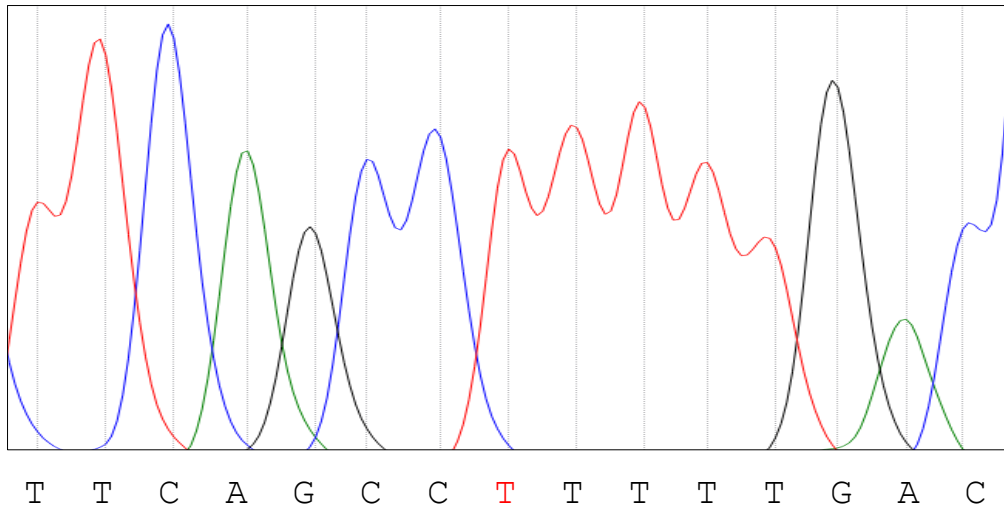

2

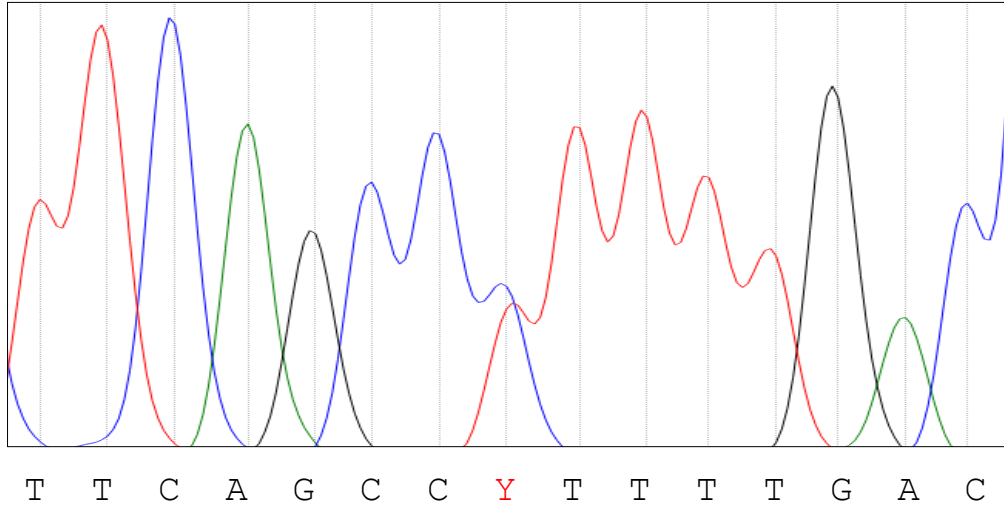

3

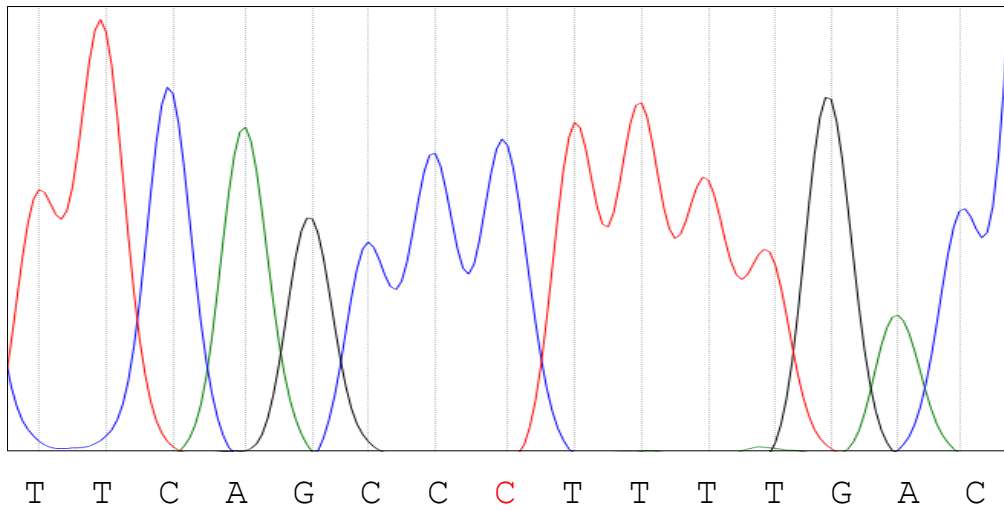

Supplement: ejhg2016157x1.pdf [file ejhg2016157x1.pdf]
